# Supplementary material for: Simultaneous quantitative detection of hematocrit and hemoglobin from whole blood using a multiplexed paper sensor with a smartphone interface
Source: Royal Society of Chemistry journal article supplement (doi:10.1039/d2lc00456a), 2022-12-09
Supplement: d2lc00456a1.pdf [file d2lc00456a1.pdf]

Electronic Supplementary Information for

**Simultaneous Quantitative Detection of Hematocrit and Hemoglobin from Whole Blood using a Multiplexed Paper Sensor with a Smartphone Interface**

Anjali<sup>1</sup>, Soumen Das,<sup>1</sup> Suman Chakraborty<sup>2\*</sup>

a. <sup>1</sup>*School of Medical Science and Technology, Indian Institute of Technology Kharagpur, Kharagpur- 721302, West Bengal, India.*

b. <sup>2</sup>*Department of Mechanical Engineering, Indian Institute of Technology Kharagpur, Kharagpur- 721302, West Bengal, India.*

\*To whom correspondence should be addressed. E-mail: sumanchakrabortyiitkgp@gmail.com, suman@mech.iitkgp.ac.in

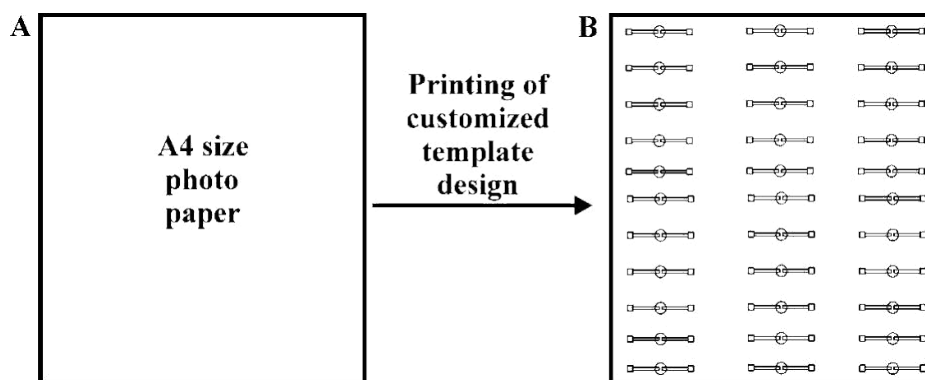

**Fig. S1.** Schematic of the sensor template mass fabrication (A) Substrate: A4 size photo paper. (B) The sensor array is printed on the non-glossy side of the photo paper.

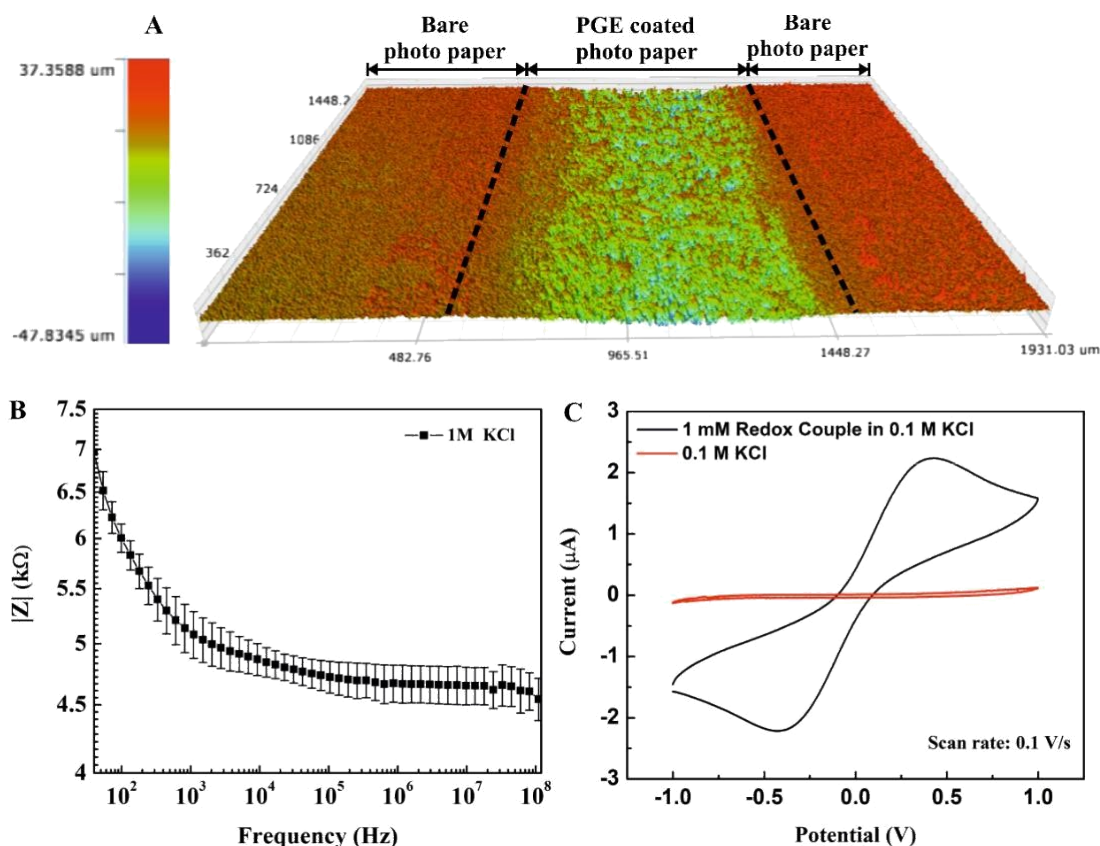

**Fig. S2.** Device Characterization (A) Optical surface profile image of the pencil graphite electrode deposited on the non-glossy side of the photo paper obtained using the non-contact mode 3D-optical surface profilometer, (B) Bode plot of the fabricated paper and pencil sensor after exposure to 1M KCl solution at a frequency between 40 Hz to 110 MHz, (C) Cyclic voltammograms of 0.1 M KCl and 1 mM  $K_4[Fe(CN)_6]/K_3[Fe(CN)_6]$  as a redox couple in 0.1 M KCl solutions recorded using non-treated PGE from -1 V to 1 V at 0.1 V/s scan rate.

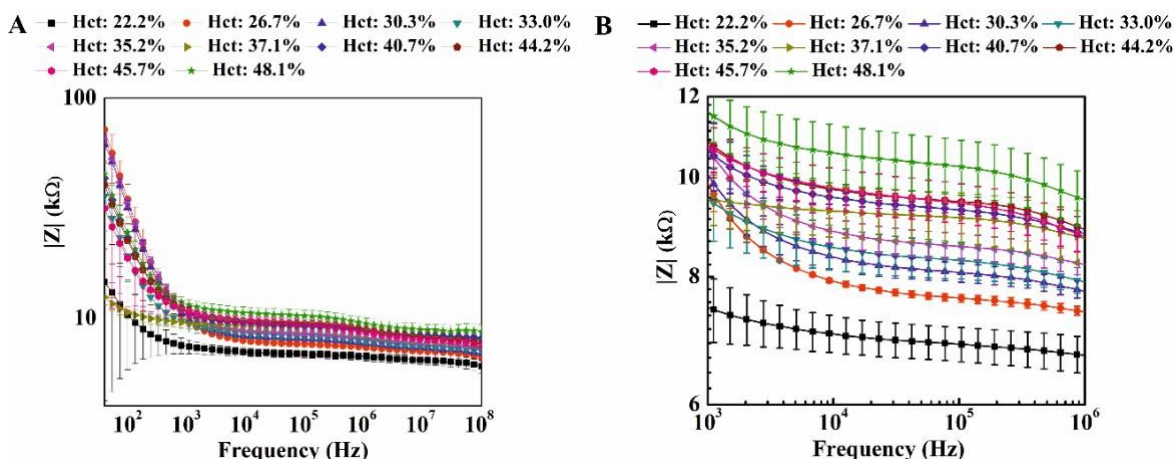

**Fig. S3.** (A) The impedance spectra of whole blood samples having different Hct (%) swept over the entire frequency spectrum between 40 Hz to 110 MHz, (B) Impedance spectra between 10 kHz to 1MHz frequency range for the blood samples.

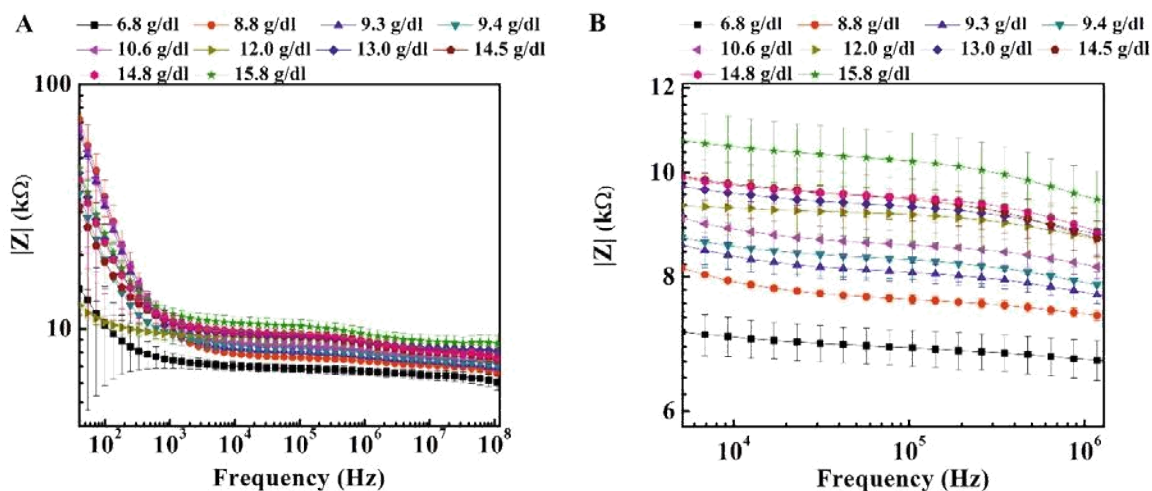

**Fig. S4.** (A) The impedance spectra of whole blood samples having different Hb values (g/dl) swept over the entire frequency spectrum between 40 Hz to 110 MHz, (B) Impedance spectra between 50 kHz to 1MHz frequency range for the blood samples.

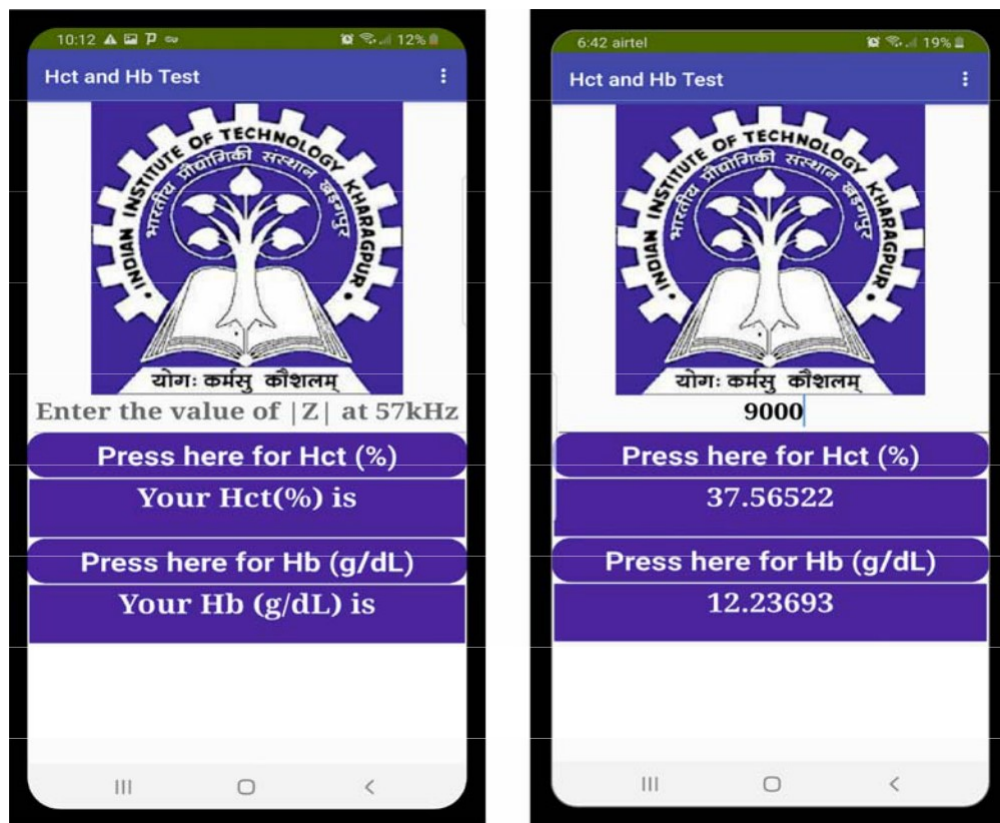

**Fig. S5.** Graphical user interface of the in-house developed Hct and Hb Test app for user-friendly Hct and Hb level determination based on the calibration code.

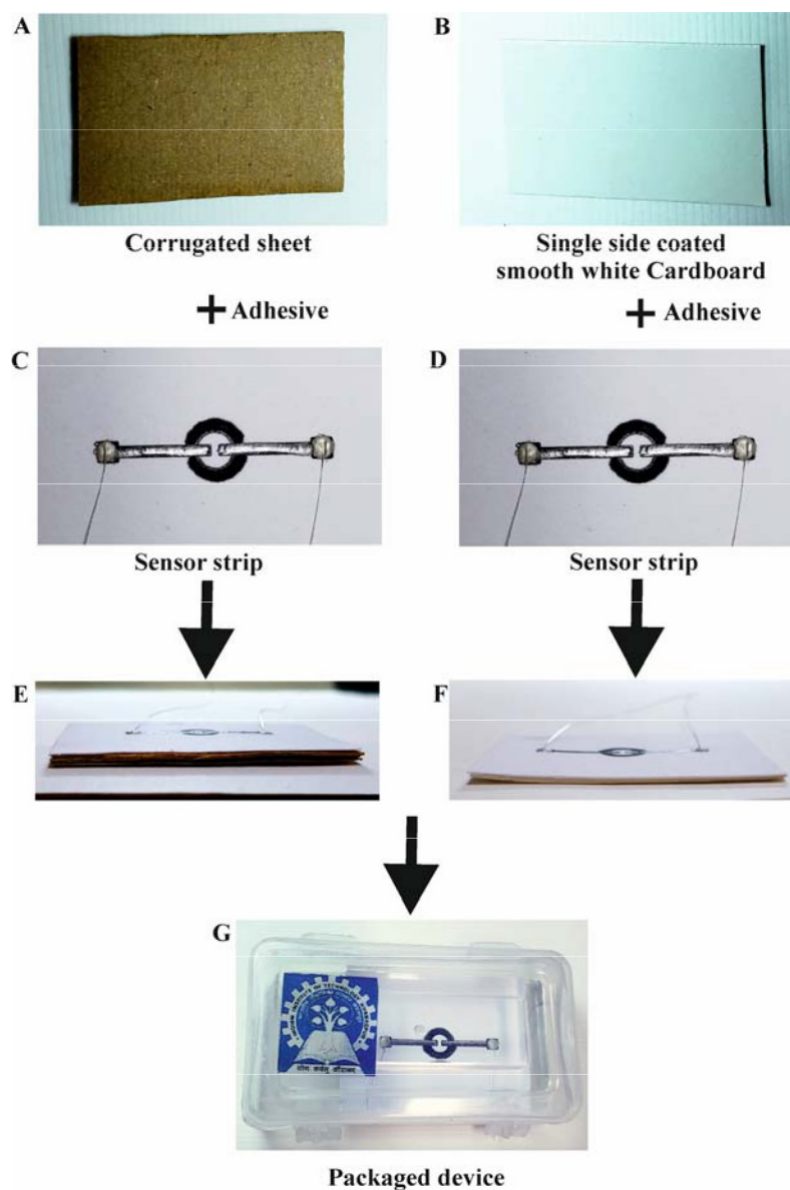

**Fig. S6.** Packaging and storage of device (A) Corrugated sheet (B) Single side coated smooth white cardboard (C) & (D) Disposable paper and pencil sensor strip (E) & (F) Side view of the device adhered to the corrugated sheet and single side coated smooth white cardboard, respectively, (G) Final packaged device inside transparent plastic box for long term storage. .

**TableS1. Comparison of various parameters of the Bland and Altman plot for evaluation of different Hct and Hb measurement methods.**

| Measurement method | Bias  | Standard deviation | Upper limit of agreement | Lower limit of agreement |
|--------------------|-------|--------------------|--------------------------|--------------------------|
| Method 1           | 0.53  | 0.97               | 2.43                     | -1.36                    |
| Method 2           | 1.27  | 0.92               | 3.07                     | -0.53                    |
| Method 3           | 1.27  | 0.92               | 3.07                     | -0.53                    |
| Method 4           | 2.24  | 0.87               | 3.94                     | 0.54                     |
| Method 5           | -0.42 | 0.98               | 1.49                     | -2.34                    |
| Present work       | 0.11  | 0.45               | 0.82                     | -1.05                    |
